# Supplementary material for: LymphoTrack Is Equally Sensitive as PCR GeneScan and Sanger Sequencing for Detection of Clonal Rearrangements in ALL Patients
Source: MDPI journal article supplement (doi:10.3390/diagnostics12061389), 2022-06-04
Supplement: s1 [file s1]

## Supplementary Results

### *Correlation between RFU and %Total reads in samples with two or more rearrangements*

#### *IGH*

In 26 of 28 samples (93%), the rearrangement that generated the highest RFU value correlated with the rearrangement that generated the highest %Total reads. A mismatch pattern was observed in sample 47 and 48. In sample 47, the peak with the highest RFU value demonstrated a VH1 rearrangement, whereas the VH1-JH1 rearrangement detected with LymphoTrack was assessed as the third most frequent rearrangement. In sample 48, the peak with the highest RFU value demonstrated a VH4-JH6 rearrangement, which was assessed as the second most frequent rearrangement with LymphoTrack (Supplementary Table 1). The discrepancies observed in two samples seemed to be caused by differences in amplification conditions in the different primer mixes.

#### *IGK*

In 15 of 19 samples (79%), the rearrangement that generated the highest RFU value correlated with the rearrangement that generated the highest %Total reads. A mismatch pattern was observed in sample 43, 50, 54 and 56, where the rearrangement with the highest RFU value was assessed as the second or third most frequent rearrangement in LymphoTrack (Supplementary Table 2). In the majority of the samples with 3 to 4 IGK rearrangements, the amplification efficiency differed between the IVS IGKA tube and the IGKB tube. E.g. in sample 55, the highest peak in the IGKB tube (14 200 RFU) generated only 6.2 %Total reads compared to the lowest peak in the IGKA tube (4 900 RFU) which generated 17.6 %Total reads. This mismatch pattern was also observed in samples 11, 43 and 56 (Supplementary Table 2). The discrepancies observed seemed to be caused by differences in amplification conditions in the IdentiClone tubes IGKA (complete rearrangements) and IGKB (incomplete rearrangements) compared to the LymphoTrack assay index master mix. In 4 of 6 samples, displaying 3 to 4 IGK rearrangements, a pattern was observed where primers amplifying

complete rearrangement seemed to outcompete primers for incomplete rearrangements with LymphoTrack. In order not to miss incomplete rearrangements suitable for MRD, we propose that confirmation using PCR GeneScan with the IVS IGKB tube should be used in cases where the LymphoTrack software identifies two complete rearrangements as the two most frequent rearrangements followed by one or two incomplete rearrangements. Alternatively, set a lower limit of %Total reads for clonality assessment in the interpretation criteria for the LymphoTrack IGK assay to include pertinent incomplete IGK rearrangements. However, to be able to determine such limitations, further comparisons on samples with 3 to 4 IGK rearrangements are needed.

### *TRG*

In 26 of 41 samples (63%), the rearrangement that generated the highest RFU value correlated with the rearrangement that generated the highest %Total reads. A mismatch pattern was observed in sample 1, 3, 11, 20, 25, 27, 28, 37, 39, 41, 53, 59, 60, 74 and 76, where the rearrangement with the highest RFU value was assessed as the second or third most frequent rearrangement with LymphoTrack (Supplementary Table 3). Unfortunately, no clear pattern was observed, hence the discrepancies observed seemed to be caused by inexplicable differences regarding amplification conditions in the different BIOMED2 tubes compared to the index master mix in LymphoTrack. Analysis of amplification differences that might have been caused by variations in the primers targeting the J $\gamma$ -genes resulted in 8 of 12 (67%) samples where the BIOMED2 primer mix seemed to over-amplify rearrangements containing the J $\gamma$ 1.3/2.3 gene. The LymphoTrack TRG assay detected eight rearrangements, which were absent in PCR GeneScan using the BIOMED2 GB tube. Seven of those rearrangements were subsequently confirmed with the IdentiClone® TCRG Gene Rearrangement Assay 2.0 for PCR GeneScan (IVS-1T-1F). This may indicate that the composition of primers and/or primer binding sites differs between the methods. The findings observed with the IVS-1T-1F may be explained by the inclusion of a new TRGJP primer. Despite this, it is not favorable using the IVS-1T-1F in PCR GeneScan prior to Sanger sequencing because of the single-color labeling

which makes it difficult to distinguish the different V- and J $\gamma$ -genes from each other (Armand, Derrieux et al. 2019).

#### *TRB*

In 7 of 13 samples (54%), the rearrangement that generated the highest RFU value correlated with the rearrangement that generated the highest %Total reads. A mismatch pattern was seen in sample 57, 61, 63, 69, 70 and 78, where the rearrangement with the highest RFU value was assessed as the second or third most frequent rearrangement with LymphoTrack (Supplementary Table 4). These discrepancies were expected to a certain degree since a comparatively large amount of primers, which were previously divided in three tubes (IVS) have been combined into one master mix in LymphoTrack, which may have led to other amplification conditions resulting in different amplification ratios.

**Supplementary Table S1.** Samples sequenced with LymphoTrack® Dx IGH FR1 Assay Panel - MiSeq®. The rearrangements, for each sample, are listed in falling order based on sequence frequency (%Total reads).

| IGH                              |         |        |        |                              |             |          |                 |             |
|----------------------------------|---------|--------|--------|------------------------------|-------------|----------|-----------------|-------------|
| Rearrangement<br>GeneScan/Sanger |         |        |        | Rearrangement<br>LymphoTrack |             |          |                 |             |
| ID                               | V-gene  | J-gene | RFU    | Merge<br>Count               | V-gene      | J-gene   | %Total<br>reads | Total Count |
| 1                                | VH3-66* | JH6*   | 7 100  | 758 455                      | IGHV3-66    | IGHJ6    | 66.1            | 1 147 858   |
| 2                                | VH3-71* | JH4*   | 9 700  | 694 866                      | IGHV3-49    | IGHJ4    | 80.9            | 858 649     |
| 3                                | VH6-1*  | JH6*   | 30 000 | 240 827                      | IGHV6-1     | IGHJ6    | 77.5            | 310 668     |
|                                  | VH6     | NA     | 16 000 | 31 902                       | IGHV6-1     | IGHJ6    | 10.3            |             |
| 4                                | VH6-1*  | JH6*   | 4 000  | 462 673                      | IGHV6-1     | IGHJ6    | 77.3            | 598 489     |
| 5                                | VH3-73* | JH4*   | 10 600 | 1 051 922                    | IGHV3-73    | IGHJ4    | 84.8            | 1 240 386   |
| 6                                | VH4-39* | JH6*   | 6 800  | 556 166                      | IGHV4-39    | IGHJ6    | 84.7            | 656 898     |
|                                  | VH3-30* | JH4*   | 1 700  | 33 751                       | IGHV3-30    | IGHJ4    | 5.1†            |             |
| 7                                | VH2-26* | JH5*   | 2 400  | 89 621                       | IGHV2-26    | IGHJ5    | 57.6            | 155 609     |
|                                  | VH1-69* | JH5*   | 1 400  | 6 742†                       | IGHV1-69    | IGHJ5    | 4.3†            |             |
| 8                                | VH3-11* | JH6*   | 32 500 | 2 558 156                    | IGHV3-11    | IGHJ6    | 83.3            | 3 060 032   |
| 9                                | VH5-51* | JH6*   | 7 000  | 504 284                      | IGHV5-51    | IGHJ6    | 37.5            | 1 344 772   |
| 10                               | VH3-30* | JH4*   | 13 400 | 99 350                       | IGHV3-30    | IGHJ5‡   | 48.5            | 204 843     |
|                                  | VH4     | NA     | 10 000 | 67 124                       | IGHV4-34    | IGHJ6    | 32.8            |             |
|                                  | VH4     | NA     | 6 000  | 21 567                       | IGHV4-28    | IGHJ5    | 10.5            |             |
| 11                               | VH3-11* | JH4*   | 27 800 | 36 484                       | IGHV3-11_04 | IGHJ4_02 | 53.6            | 68 054      |
|                                  | VH4-31* | JH5*   | 18 000 | 14 343                       | IGHV4-31_03 | IGHJ5_02 | 21.1            |             |
| 12                               | VH3-64* | JH4*   | 33 000 | 55 570                       | IGHV3-64    | IGHJ4    | 89.6            | 62 021      |
| 13                               | VH3     | NA     | 15 500 | 49 365                       | IGHV3-23    | IGHJ6    | 94.7            | 52 149      |
| 14                               | VH3     | NA     | 3 900  | 98 292                       | IGHV3-23    | IGHJ4    | 15.4            | 640 286     |
| 15                               | VH3     | NA     | 31 300 | 640 228                      | IGHV3-64    | IGHJ4    | 76.1            | 841 107     |
| 16                               | VH5     | NA     | 17 000 | 942 574                      | IGHV5-51    | IGHJ6    | 83.3            | 1 131 091   |
| 17                               | VH3     | NA     | 24 700 | 413 166                      | IGHV3-30    | IGHJ6    | 46.1            | 895 378     |
|                                  | VH1     | NA     | 21 000 | 225 518                      | IGHV1-3     | IGHJ6    | 24.2            |             |

|    |            |    |        |            |           |        |      |           |
|----|------------|----|--------|------------|-----------|--------|------|-----------|
| 18 | VH6        | NA | 18 000 | 41 267     | IGHV6-1   | IGHJ4  | 75.4 | 54 747    |
| 19 | VH3        | NA | 20 800 | 48 456     | IGHV3-49  | IGHJ4  | 89.4 | 54 196    |
| 20 | VH3        | NA | 16 500 | 21 050     | IGHV3-21  | IGHJ6  | 39.4 | 53 471    |
|    | VH6        | NA | 11 000 | 13 617     | IGHV6-1   | IGHJ4  | 25.5 |           |
| 21 | VH4        | NA | 30 400 | 27 423     | IGHV4-34  | IGHJ6  | 53.1 | 51 664    |
|    | VH1        | NA | 18 700 | 16 925     | IGHV1-2   | IGHJ5  | 32.8 |           |
|    | VH6        | NA | 3 500  | 1 258†     | IGHV6-1   | IGHJ6  | 2.4† |           |
| 22 | VH6        | NA | 17 000 | 32 624     | IGHV6-1   | IGHJ6  | 54.7 | 59 652    |
|    | VH1        | NA | 11 000 | 19 220     | IGHV1-3   | IGHJ4  | 32.2 |           |
| 23 | POLYCLONAL |    |        | POLYCLONAL |           |        |      |           |
| 24 | POLYCLONAL |    |        | 733¥       | IGHV3-7   | IGHJ4  | 0.4¥ | 194 193   |
| 25 | VH1        | NA | 16 600 | 398 217    | IGHV1-2   | IGHJ3  | 49.5 | 804 379   |
|    | VH2        | NA | 5 700  | 91 273     | IGHV2-5   | IGHJ3  | 11.3 |           |
|    | VH1        | NA | 2 000  | 39 010     | IGHV1-3   | IGHJ3  | 4.8† |           |
|    | VH4        | NA | 1 900  | 32 861     | IGHV4-34  | IGHJ6  | 4.1† |           |
| 26 | VH3        | NA | 18 000 | 511 321    | IGHV3-74  | IGHJ3  | 43.5 | 1 174 628 |
|    | VH3        | NA | 7 700  | 510 524    | IGHV3-64  | IGHJ4  | 43.5 |           |
| 27 | VH1        | NA | 32 300 | 1 092 897  | IGHV1-3   | IGHJ5  | 87.6 | 1 248 004 |
| 28 | VH3        | NA | 30 000 | 729 389    | IGHV3-11  | IGHJ3  | 84.6 | 862 279   |
|    | VH1        | NA | 4 300  | 15 332     | IGHV1-3   | IGHJ5  | 1.8† |           |
| 29 | VH4        | NA | 33 000 | 441 927    | IGHV4-34  | IGHJ6  | 43.4 | 1 019 290 |
|    | VH3        | NA | 29 500 | 429 762    | IGHV3-35  | IGHJ6  | 42.2 |           |
| 30 | VH4        | NA | 33 000 | 945 334    | IGHV4-59  | IGHJ6  | 86.6 | 1 092 251 |
|    | VH3        | NA | 1 300  | 2 294†     | IGHV3-30  | IGHJ6  | 0.2† |           |
| 31 | POLYCLONAL |    |        | 3 937¥     | IGHV4-34  | IGHJ4  | 2.3¥ | 172 182   |
| 32 | VH3        | NA | 33 000 | 490 679    | IGHV3-13  | IGHJ4  | 45.8 | 1 072 240 |
|    | VH3        | NA | 28 000 | 421 918    | IGHV3-30  | IGHJ4  | 39.4 |           |
| 33 | VH3        | NA | 33 000 | 1 200 530  | IGHV3-74  | IGHJ5‡ | 69.1 | 1 738 748 |
|    | VH7        | NA | 22 000 | 332 161    | IGHV7-4-1 | IGHJ5‡ | 19.1 |           |

|    |            |    |                     |         |            |          |      |           |
|----|------------|----|---------------------|---------|------------|----------|------|-----------|
| 34 | VH3        | NA | 10 400              | 430 714 | IGHV3-23   | IGHJ6    | 29.3 | 1 472 567 |
| 35 | VH1        | NA | 32 000              | 41 686  | IGHV7-4-1  | IGHJ4    | 53.9 | 77 438    |
|    | VH1        | NA | 24 000              | 26 511  | IGHV1-69   | IGHJ3    | 34.2 |           |
| 36 | VH1        | NA | 5 900               | 12 756  | IGHV3-74   | IGHJ6    | 26.9 | 47 365    |
|    | VH3        | NA | 3 400               | 7 271†  | IGHV3-74   | IGHJ6    | 15.4 |           |
| 37 | VH3        | NA | 30 000              | 28 712  | IGHV3-30   | IGHJ4    | 50.4 | 57 016    |
|    | VH3        | NA | 8 700               | 21 775  | IGHV3-20   | IGHJ6    | 38.2 |           |
| 38 | VH4        | NA | 29 600              | 399 652 | IGHV4-34   | IGHJ6    | 46.8 | 853 967   |
|    | VH2        | NA | 2 400               | 171 043 | IGHV2-5    | IGHJ4    | 20.0 |           |
|    | VH3        | NA | 6 700               | 88 459  | IGHV3-21   | IGHJ6    | 10.4 |           |
| 39 | POLYCLONAL |    |                     | 348¥    | IGHV6      | IGHJ4    | 1.0¥ | 34 409    |
| 40 | VH3        | NA | 12 800              | 60 618  | IGHV3-13   | IGHJ6    | 80.5 | 75 309    |
| 41 | VH3        | NA | 11 300              | 50 006  | IGHV3-30-3 | IGHJ6    | 53.7 | 93 071    |
|    | VH2        | NA | 4 200               | 17 904  | IGHV2-5    | IGHJ5    | 19.2 |           |
| 42 | VH6        | NA | 5 400               | 72 725  | IGHV6-1    | IGHJ4    | 75.2 | 96 684    |
| 43 | VH3        | NA | 14 400              | 57 628  | IGHV3-9    | IGHJ4    | 48.1 | 119 727   |
|    | VH3        | NA | 5 700               | 4 770†  | IGHV3-11   | IGHJ6    | 4.0† |           |
| 44 | VH3        | NA | 26 200              | 92 192  | IGHV3-43   | IGHJ5    | 87.4 | 105 548   |
| 45 | VH3        | NA | 7 800               | 58 464  | IGHV3-30   | IGHJ5    | 69.5 | 84 111    |
|    | VH2        | NA | 4 200               | 17 160  | IGHV2-5    | IGHJ6    | 20.4 |           |
| 46 | VH3        | NA | 17 000              | 15 451  | IGHV3-d    | IGHJ6    | 29.1 | 53 145    |
|    | VH3        | NA | 17 000              | 15 329  | IGHV3-d    | IGHJ6    | 28.8 |           |
|    | VH3        | NA | 2 500               | 14 910  | IGHV3-30   | IGHJ5_02 | 28.1 |           |
| 47 | VH3        | NA | 25 100              | 314 704 | IGHV3-66   | IGHJ4    | 35.3 | 891 841   |
|    | VH3        | NA | 20 400              | 290 824 | IGHV3-49   | IGHJ1    | 32.6 |           |
|    | VH1        | NA | 33 000 <sup>£</sup> | 136 095 | IGHV1-69   | IGHJ1    | 15.3 |           |
| 48 | VH3        | NA | 2 300               | 43 369  | IGHV3-11   | IGHJ2    | 56.5 | 76 776    |
|    | VH4        | NA | 5 500 <sup>£</sup>  | 24 041  | IGHV4-59   | IGHJ6    | 31.3 |           |
| 49 | VH6        | NA | 7 600               | 34 100  | IGHV6-1_02 | IGHJ5_02 | 35.0 | 97 565    |
| 50 | POLYCLONAL |    |                     | 46¥     | IGHV3      | IGHJ5    | 11.3 | 407¥      |

|           |            |      |        |           |          |       |      |           |
|-----------|------------|------|--------|-----------|----------|-------|------|-----------|
| <b>51</b> | POLYCLONAL |      |        | 1 295¥    | IGHV6    | none  | 4.5¥ | 28 944    |
| <b>52</b> | VH3        | NA   | 33 000 | 70 953    | IGHV3-49 | IGHJ6 | 91.8 | 77 307    |
| <b>53</b> | VH6        | NA   | 7 500  | 3 813 858 | IGHV6-1  | none  | 53.7 | 7 102 993 |
|           | VH6        | NA   | 3 600  | 2 277 298 | IGHV6-1  | IGHJ4 | 32.1 |           |
| <b>54</b> | VH1-45*    | JH6* | 15 000 | 114 950   | IGHV1-45 | IGHJ6 | 53.9 | 213 135   |
| <b>55</b> | VH3        | NA   | 14 500 | 89 398    | IGHV3-43 | IGHJ6 | 71.7 | 124 685   |
|           | VH4        | NA   | 11 800 | 24 063    | IGHV4-34 | IGHJ5 | 19.3 |           |
| <b>56</b> | VH3-23*    | JH6* | 19 000 | 427 753   | IGHV3-23 | IGHJ6 | 87.0 | 491 690   |

\*Genes verified with Sanger Sequencing. The other genes were verified with GeneScan only, hence the NA in the J-gene column.

**NA** Not Available.

†Interpretation criteria not fulfilled, and/or the peak observed with GeneScan is very small or has a high background.

‡The LymphoTrack Software states another gene family number than the IMGT database.

¥Interpretation criteria not fulfilled due to polyclonal pattern.

£The RFU value of the peak in GeneScan does not correlate to the amplification frequency %Total reads in LymphoTrack.

**Supplementary Table S2.** Samples sequenced with LymphoTrack® Dx IGK Assay Panel - MiSeq®. The rearrangements, for each sample, are listed in falling order based on sequence frequency (%Total reads).

| IGK                              |              |        |                     |                              |           |        |                 |             |
|----------------------------------|--------------|--------|---------------------|------------------------------|-----------|--------|-----------------|-------------|
| Rearrangement<br>GeneScan/Sanger |              |        |                     | Rearrangement<br>LymphoTrack |           |        |                 |             |
| ID                               | V-gene       | J-gene | RFU                 | Merge<br>count               | V-gene    | J-gene | %Total<br>reads | Total count |
| 1                                | VK1-39*      | JK1*   | 18 300              | 436 264                      | IGKV1D-39 | IGKJ1  | 42.6            | 1 023 299   |
|                                  | VK2*         | KDE*   | 4 000               | 191 167                      | IGKV2-30  | IGKDEL | 18.7            |             |
| 2                                | VK6-21*      | KDE*   | 6 000               | 489 962                      | IGKV6D-21 | IGKDEL | 60.1            | 815 044     |
|                                  | VK1f/6/VK7   | KDE    | 1 000               | 159 881                      | IGKV7-3   | IGKDEL | 19.6            |             |
| 3                                | VK1-33*      | JK4*   | 21 000              | 422 140                      | IGKV1D-33 | IGKJ4  | 45.1            | 935 954     |
|                                  | INTR*        | KDE*   | 12 200              | 234 742                      | IGKINTR   | IGKDEL | 25.1            |             |
| 4                                | VK3-15*      | JK2*   | 33 000              | 564 363                      | IGKV3-15  | IGKJ2  | 63.8            | 885 069     |
|                                  | VK3*         | KDE*   | 10 400              | 230 884                      | IGKV3-7   | IGKDEL | 26.1            |             |
| 5                                | VK1f/6/VK7   | JK     | 32 500              | 260 417                      | IGKV1-16  | IGKJ5  | 30.3            | 858 196     |
|                                  | INTR*        | KDE*   | 13 300              | 238 602                      | IGKINTR   | IGKDEL | 27.8            |             |
|                                  | VK2-30*      | KDE*   | 7 300               | 135 158                      | IGKV2-30  | IGKDEL | 15.7            |             |
| 6                                | POLYCLONAL   |        |                     | 1 228¥                       | IGKV4-1   | IGKJ4  | 4.2¥            | 29 060      |
| 7                                | VK3*         | KDE*   | 23 200              | 329 589                      | IGKV3D-20 | IGKDEL | 39.4            | 837 174     |
|                                  | VK2*         | KDE*   | 5 700               | 174 233                      | IGKV2-30  | IGKDEL | 20.8            |             |
|                                  | INTR*        | KDE*   | 400†                | 72 734                       | IGKINTR   | IGKDEL | 8.7†            |             |
| 8                                | VK7-3*       | KDE*   | 13 200              | 77 326                       | IGKV7-3   | IGKDEL | 9.8†            | 790 257     |
|                                  | VK1f/6/VK7   | KDE    | 6 000†              |                              | ND        |        |                 |             |
| 9                                | VK1-5*       | KDE*   | 32 500              | 485 012                      | IGKV1-5   | IGKDEL | 37.2            | 1 304 670   |
| 10                               | VK1f/6/VK7   | JK     | 14 200              | 90 461                       | IGKV1D-37 | IGKJ4  | 94.8            | 95 386      |
| 11                               | VK1f/6/VK7   | JK     | 33 000              | 35 553                       | IGKV1D-37 | IGKJ2  | 31.9            | 111 559     |
|                                  | VK2f/VK4/VK5 | JK     | 5 200 <sup>£</sup>  | 27 602                       | IGKV2D-26 | IGKJ4  | 24.7            |             |
|                                  | INTR*        | KDE*   | 11 800 <sup>£</sup> | 20 398                       | IGKINTR   | IGKDEL | 18.3            |             |
|                                  | VK2*         | KDE*   | 3 600               | 11 196                       | IGKV2-24  | IGKDEL | 10.0            |             |
| 12                               | VK1f/6/VK7*  | KDE*   | 24 400              | 103 699                      | IGKV1-8   | IGKDEL | 33.6            | 308 672     |
| 13                               | VK1f/6/VK7   | JK     | 23 000              | 138 845                      | IGKV1D-33 | none   | 32.8            | 423 184     |
|                                  | POLYCLONAL   |        |                     | 52 058                       | IGKINTR   | IGKDEL | 12.3            |             |
|                                  | ND           |        |                     | 41 802                       | IGKV1D-43 | IGKJ2  | 10.0            |             |



|    |              |      |        |           |           |        |      |           |
|----|--------------|------|--------|-----------|-----------|--------|------|-----------|
| 14 | VK7*         | KDE* | 12 000 | 307 499   | IGKV7-3   | IGKDEL | 25.5 | 1 205 279 |
|    | VK1f/6/VK7   | KDE  | 6 800  |           | ND        |        |      |           |
| 15 | VK2f/VK4/VK5 | KDE  | 10 000 | 481 304   | IGKV2-30  | IGKDEL | 47.3 | 1 016 655 |
| 16 | VK3f         | JK   | 20 000 | 1 448 397 | IGKV3D-20 | IGKJ2  | 76.9 | 1 883 420 |
| 17 | VK1f/6/VK7   | JK   | 16 500 | 923 153   | IGKV1D-33 | IGKJ4  | 83.5 | 1 105 869 |
| 18 | POLYCLONAL   |      |        | 318¥      | IGKV1-6   | IGKJ2  | 7.1¥ | 4 507¥    |
| 19 | POLYCLONAL   |      |        | 8 996¥    | IGKV4-1   | IGKJ2  | 9.6¥ | 93 695    |
| 20 | VK2f/VK4/VK5 | KDE  | 19 200 | 101 212   | IGKV2-24  | IGKDEL | 70.3 | 143 935   |
| 21 | POLYCLONAL   |      |        | 898¥      | IGKV1     | IGKJ2  | 3.0¥ | 30 145    |
| 22 | POLYCLONAL   |      |        | 1 307¥    | IGKV3D-20 | IGKJ2  | 1.9¥ | 67 380    |
| 23 | VK1f/6/VK7   | KDE  | 1 300  | 34 104    | IGKV1D-37 | IGKDEL | 8.0† | 423 922   |
| 24 | POLYCLONAL   |      |        | 2 783¥    | IGKINTR   | IGKDEL | 0.6¥ | 474 912   |
| 25 | VK3f         | JK   | 19 500 | 357 833   | IGKV3D-20 | IGKJ4  | 44.3 | 807 487   |
|    | VK3f/INTR    | KDE  | 6 000  | 164 354   | IGKINTR   | IGKDEL | 20.4 |           |
|    | VK3f/INTR    | KDE  | 500    | 88 319    | IGKINTR   | IGKDEL | 10.9 |           |
| 26 | VK1f/6/VK7   | KDE  | 22 000 | 519 536   | IGKV7-3   | IGKDEL | 45.0 | 1 154 919 |
|    | VK1f/6/VK7   | KDE  | 7 200  | 477 179   | IGKV1-16  | IGKDEL | 41.3 |           |
| 27 | VK1f/6/VK7   | KDE  | 30 500 | 510 554   | IGKV7-3   | IGKDEL | 41.6 | 1 228 807 |
|    | VK1f/6/VK7   | KDE  | 7 100  | 505 842   | IGKV7-3   | IGKDEL | 41.2 |           |
| 28 | VK3f         | JK   | 33 000 | 1 136 199 | IGKV3D-20 | IGKJ2  | 69.2 | 1 642 863 |
|    | VK3f/INTR    | KDE  | 33 000 | 421 355   | IGKV3D-20 | IGKDEL | 25.7 |           |
| 29 | POLYCLONAL   |      |        | 6 054¥    | IGKV1D-33 | IGKJ4  | 1.4¥ | 432 512   |
| 30 | VK3f         | JK   | 12 500 | 778 373   | IGKV3-15  | IGKJ4  | 50.8 | 1 532 475 |
| 31 | POLYCLONAL   |      |        | 31 581    | IGKV5-2   | none   | 5.4¥ | 581 270   |
| 32 | POLYCLONAL   |      |        | 2 283¥    | IGKV4-1   | IGKJ2  | 2.8¥ | 82 223    |
| 33 | VK3f/INTR    | KDE  | 11 000 | 69 790    | IGKV3D-20 | IGKDEL | 16.1 | 433 575   |

|    |              |     |                     |         |           |        |      |           |
|----|--------------|-----|---------------------|---------|-----------|--------|------|-----------|
| 34 | POLYCLONAL   |     |                     | 16 852  | IGKV7-3   | IGKDEL | 1.6¥ | 1 075 776 |
| 35 | POLYCLONAL   |     |                     | 2 592¥  | IGKV3-15  | IGKJ1  | 3.6¥ | 72 453    |
| 36 | VK3f/INTR    | KDE | 23 000              | 6 981†  | IGKINTR   | IGKDEL | 10.9 | 64 082    |
| 37 | POLYCLONAL   |     |                     | 452¥    | IGKV4-1   | IGKJ4  | 0.8¥ | 89 258    |
| 38 | POLYCLONAL   |     |                     | 1 890¥  | IGKV3D-20 | IGKDEL | 2.6¥ | 72 067    |
| 39 | VK2f/VK4/VK5 | KDE | 19 400              | 104 122 | IGKV4-1   | IGKDEL | 81.4 | 127 847   |
| 40 | POLYCLONAL   |     |                     | 690¥    | IGKV3     | IGKJ1  | 3.5¥ | 19 875    |
| 41 | POLYCLONAL   |     |                     | 69¥     | IGKV4-1   | IGKDEL | 4.8¥ | 1 425     |
| 42 | POLYCLONAL   |     |                     | 1 395¥  | IGKV4-1   | IGKJ4  | 1.9¥ | 73 449    |
| 43 | VK2f/VK4/VK5 | JK  | 3 300 <sup>£</sup>  | 101 939 | IGKV2D-30 | none   | 43.3 | 235 579   |
|    | VK1f/6/VK7   | JK  | 16 500              | 52 220  | IGKV1D-39 | IGKJ2  | 22.2 |           |
|    | VK3f/INTR    | KDE | 19 700 <sup>£</sup> | 45 793  | IGKINTR   | IGKDEL | 19.4 |           |
| 44 | VK1f/6/VK7   | JK  | 27 800              | 91 117  | IGKV1D-37 | none   | 47.4 | 192 063   |
|    | VK3f/INTR    | KDE | 22 800              | 86 028  | IGKV3D-20 | IGKDEL | 44.8 |           |
| 45 | POLYCLONAL   |     |                     | 150 257 | IGKV4-1   | IGKJ4  | 2.7¥ | 5 448 611 |
| 46 | POLYCLONAL   |     |                     | 1 269¥  | IGKV4     | IGKJ2  | 1.3¥ | 96 174    |
| 47 | VK1f/6/VK7   | KDE | 21 700              | 46 455  | IGKV1-16  | IGKDEL | 76.5 | 60 730    |
| 48 | VK2f/VK4/VK5 | KDE | 3 200               | 23 138  | IGKV2-30  | IGKDEL | 53.9 | 42 902    |
| 49 | POLYCLONAL   |     |                     | 2 000¥  | IGKV3D-20 | IGKDEL | 3.3¥ | 61 084    |
| 50 | VK1f/6/VK7   | JK  | 31 700 <sup>£</sup> | 22 822  | IGKV1D-39 | IGKJ2  | 47.5 | 48 057    |
|    | VK2f/VK4/VK5 | KDE | 33 000 <sup>£</sup> | 13 272  | IGKV2D-30 | IGKDEL | 27.6 |           |
| 51 | VK1f/6/VK7   | KDE | 4 900               | 23 859  | IGKV5     | IGKJ2  | 4.2† | 575 351   |
| 52 | VK1f/6/VK7   | KDE | 25 600              | 32 899  | IGKV7-3   | IGKDEL | 78.4 | 41 981    |
|    | VK1f/6/VK7   | KDE | 8 100               |         | ND        |        |      |           |
| 53 | VK1f/6/VK7   | JK  | 33 000              | 315 889 | IGKV1D-39 | IGKJ5  | 42.5 | 743 374   |
|    | VK3f/INTR    | KDE | 20 300              | 190 451 | IGKINTR   | IGKDEL | 25.6 |           |

|    |              |      |                     |         |           |        |      |         |
|----|--------------|------|---------------------|---------|-----------|--------|------|---------|
| 54 | POLYCLONAL   |      |                     | 52 382  | IGKV1D-33 | IGKJ4  | 24.5 | 214 156 |
|    | VK3f/INTR    | KDE  | 4 500               | 37 456  | IGKINTR   | IGKDEL | 17.5 |         |
|    | VK2f/VK4/VK5 | KDE  | 2 000               | 22 332  | IGKV2-30  | IGKDEL | 10.4 |         |
| 55 | VK3f         | JK   | 33 000              | 118 222 | IGKV3D-20 | IGKJ2  | 69.0 | 171 471 |
|    | VK2f/VK4/VK5 | JK   | 4 900 <sup>£</sup>  | 30 104  | IGKV2D-30 | IGKJ4  | 17.6 |         |
|    | INTR*        | KDE* | 14 200 <sup>£</sup> | 10 634  | IGKINTR   | IGKDEL | 6.2† |         |
|    | VK2*         | KDE* | 7 100 <sup>£</sup>  | 2 117†  | IGKV2-30  | IGKDEL | 1.2† |         |
| 56 | VK3f/INTR    | KDE  | 9 400 <sup>£</sup>  | 183 159 | IGKINTR   | IGKDEL | 38.9 | 470 447 |
|    | VK2f/VK4/VK5 | JK   | 33 000 <sup>£</sup> | 126 227 | IGKV2-24  | IGKJ5  | 26.8 |         |
|    | VK2f/VK4/VK5 | KDE  | 4 000               | 92 862  | IGKV2-24  | IGKDEL | 19.7 |         |

\*Genes verified with Sanger Sequencing. The other genes were verified with GeneScan only.

**ND** Not Detected

†Interpretation criteria not fulfilled, and/or the peak observed with GeneScan is very small or has a high background.

¥Interpretation criteria not fulfilled due to polyclonal pattern.

£The RFU value of the peak in GeneScan does not correlate to the amplification frequency %Total reads in LymphoTrack.

**Supplementary Table S3.** Samples sequenced with LymphoTrack® Dx TRG Assay Panel - MiSeq®. The rearrangements, for each sample, are listed in falling order based on sequence frequency (%Total reads).

| TCRG                             |                   |            |                     |                              |        |        |               |             |
|----------------------------------|-------------------|------------|---------------------|------------------------------|--------|--------|---------------|-------------|
| Rearrangement<br>GeneScan/Sanger |                   |            |                     | Rearrangement<br>LymphoTrack |        |        |               |             |
| ID                               | V-gene            | J-gene     | RFU                 | Merge count                  | V-gene | J-gene | % total reads | Total count |
| 1                                | Vγ2*              | Jγ1.1/2.1* | 28 000 <sup>£</sup> | 451 925                      | Vγ2    | JγP1   | 53.2          | 850 268     |
|                                  | Vγ3*              | Jγ1.3/2.3* | 29 000 <sup>£</sup> | 269 801                      | Vγ3    | none   | 31.7          |             |
| 2                                | Vγ8*              | Jγ1.1/2.1* | 6 000               | 433 339                      | Vγ8    | JγP1   | 43.4          | 997 995     |
|                                  | Vγ3*              | Jγ1.3/2.3* | 4 000               | 335 469                      | Vγ3    | Jγ1/2  | 33.6          |             |
| 3                                | Vγ9*              | Jγ1.1/2.1* | 13 600 <sup>£</sup> | 471 431                      | Vγ9    | JγP1   | 56.6          | 833 048     |
|                                  | Vγ11 <sup>‡</sup> | NA         | 17 000 <sup>£</sup> | 222 448                      | Vγ11   | Jγ1/2  | 26.7          |             |
| 4                                | Vγ11 <sup>‡</sup> | NA         | 33 000              | 560 773                      | Vγ11   | none   | 87.2          | 643 211     |
| 5                                | Vγ2*              | Jγ1.1/2.1* | 9 300               | 754 841                      | Vγ2    | JγP1   | 67.4          | 1 119 271   |
| 6                                | Vγ9*              | Jγ1.1/2.1* | 1 100               | 41 176                       | Vγ9    | none   | 15.9          | 259 130     |
|                                  | Vγ5*              | Jγ1.3/2.3* | 300                 | 35 032                       | Vγ5    | Jγ1/2  | 13.5          |             |
| 7                                | Vγ2*              | Jγ1.3/2.3* | 2 200               | 431 140                      | Vγ2    | Jγ1/2  | 57.1          | 754 597     |
|                                  | Vγ5*              | Jγ1.3/2.3* | 1 300               | 115 012                      | Vγ5    | Jγ1/2  | 15.2          |             |
| 8                                | POLYCLONAL        |            |                     | 1 289                        | Vγ3    | Jγ1/2  | 5.8¥          | 21 903      |
| 9                                | Vγ8               | Jγ1.3/2.3  | 4 500               | 128 432                      | Vγ8    | Jγ1/2  | 46.0          | 279 386     |
|                                  | Vγ5               | Jγ1.3/2.3  | 4 500               | 110 325                      | Vγ5    | none   | 39.5          |             |
| 10                               | Vγ10              | Jγ1.3/2.3  | 5 400               | 41 101                       | Vγ10   | Jγ1/2  | 54.9          | 74 902      |
|                                  | Vγ2               | Jγ1.3/2.3  | 4 000               | 30 128                       | Vγ2    | Jγ1/2  | 40.2          |             |
| 11                               | Vγ2*              | Jγ1.3/2.3* | 7 600               | 1 390 055                    | Vγ2    | Jγ1/2  | 29.4          | 4 723 753   |
|                                  | Vγ1-8             | Jγ1.1/2.1  | 1 800               | 1 936 503                    | Vγ3    | JγP1   | 41.0          |             |
| 12                               | Vγ1-8             | Jγ1.1/2.1  | 4 100               | 8 124                        | Vγ3    | JγP2   | 3.0¥          | 268 197     |
| 13                               | POLYCLONAL        |            |                     | 5 664¥                       | Vγ9    | Jγ1/2  | 9.7¥          | 58 171      |
| 14                               | POLYCLONAL        |            |                     | 358¥                         | Vγ10   | JγP1   | 0.6¥          | 60 501      |
| 15                               | Vγ1-8             | Jγ1.1/2.1  | 14 000              | 1 586 018                    | Vγ8    | JγP1   | 72.3          | 2 192 974   |
|                                  | Vγ9               | Jγ1.3/2.3  | 10 000              | 327 210                      | Vγ9    | Jγ1/2  | 14.9          |             |

|    |                   |            |                     |           |                  |        |                  |           |
|----|-------------------|------------|---------------------|-----------|------------------|--------|------------------|-----------|
| 16 | POLYCLONAL        |            |                     | 6 072     | Vγ2              | Jγ1/2  | 3.4¥             | 180 326   |
| 17 | POLYCLONAL        |            |                     | 2 425     | Vγ2              | JγP2   | 1.6¥             | 153 365   |
| 18 | POLYCLONAL        |            |                     | 107¥      | Vγ10             | Jγ 1/2 | 4.8¥             | 2 248¥    |
| 19 | POLYCLONAL        |            |                     | 4 858¥    | Vγ9              | none   | 10.1             | 47 899    |
| 20 | Vγ11 <sup>‡</sup> | NA         | 15 000 <sup>£</sup> | 413 163   | Vγ11             | JγP1   | 53.6             | 771 393   |
|    | Vγ10              | Jγ1.1/2.1  | 3 800 <sup>£</sup>  | 210 673   | Vγ10             | JγP1   | 27.3             |           |
|    | Vγ11 <sup>‡</sup> | NA         | 11 000 <sup>£</sup> | 109 726   | Vγ11             | JγP1   | 14.2             |           |
| 21 | POLYCLONAL        |            |                     | 387¥      | Vγ11             | Jγ1/2  | 1.8¥             | 21 502    |
| 22 | POLYCLONAL        |            |                     | 978¥      | Vγ10             | JγP1   | 2.2¥             | 45 156    |
| 23 | Vγ9               | Jγ1.1/2.1  | 33 000              | 219 519   | Vγ9              | JγP2   | 56.6             | 387 769   |
|    | Vγ9               | Jγ1.3/2.3  | 1 800               | 100 656   | Vγ9              | Jγ1/2  | 26.0             |           |
| 24 | POLYCLONAL        |            |                     | 2 810¥    | Vγ11             | JγP2   | 0.8¥             | 333 828   |
| 25 | Vγ1-8             | Jγ1.3/2.3  | 4 800 <sup>£</sup>  | 208 793   | Vγ3              | Jγ1/2  | 57.5             | 363 208   |
|    | Vγ1-8             | Jγ1.3/2.3  | 2 500 <sup>£</sup>  | 101 484   | Vγ2              | Jγ1/2  | 27.9             |           |
|    | Vγ9*              | Jγ1.3/2.3* | 8 300 <sup>£</sup>  | 8 718     | Vγ9              | Jγ1/2  | 2.4 <sup>†</sup> |           |
| 26 | Vγ1-8             | Jγ1.1/2.1  | 33 000              | 892 918   | Vγ5              | JγP1   | 69.4             | 1 287 512 |
|    | Vγ9               | Jγ1.3/2.3  | 21 500              | 336 388   | Vγ9              | Jγ1/2  | 26.1             |           |
| 27 | Vγ1-8             | Jγ1.1/2.1  | 8 400 <sup>£</sup>  | 740 009   | Vγ8              | JγP1   | 55.5             | 1 332 525 |
|    | Vγ1-8             | Jγ1.3/2.3  | 12 000 <sup>£</sup> | 497 602   | Vγ2              | Jγ1/2  | 37.3             |           |
| 28 | Vγ1-8             | Jγ1.1/2.1  | 12 000 <sup>£</sup> | 361 680   | Vγ8              | JγP1   | 29.9             | 1 208 417 |
|    | Vγ1-8             | Jγ1.3/2.3  | 22 300 <sup>£</sup> | 201 436   | Vγ2              | Jγ1/2  | 16.7             |           |
| 29 | POLYCLONAL        |            |                     | 10 844    | Vγ11             | Jγ1/2  | 1.9¥             | 577 777   |
| 30 | POLYCLONAL        |            |                     | 1 114 568 | Vγ2 <sup>‡</sup> | JγP    | 89.4             | 1 246 423 |
| 31 | POLYCLONAL        |            |                     | 99 800    | Vγ4              | JγP1   | 8.9¥             | 1 116 539 |
| 32 | POLYCLONAL        |            |                     | 1 533¥    | Vγ8              | JγP1   | 2.0¥             | 76 887    |
| 33 | POLYCLONAL        |            |                     | 76 956    | Vγ4              | JγP1   | 6.9¥             | 1 116 832 |

|    |                         |            |                     |                    |      |       |                  |                    |
|----|-------------------------|------------|---------------------|--------------------|------|-------|------------------|--------------------|
| 34 | Vγ1-8                   | Jγ1.3/2.3  | 5 200               | 374 907            | Vγ4  | none  | 35.4             | 1 057 985          |
| 35 | POLYCLONAL              |            |                     | 993¥               | Vγ3  | JγP2  | 1.7¥             | 59 490             |
| 36 | Vγ1-8                   | Jγ1.1/2.1  | 9 800               | 377 749            | Vγ8  | JγP1  | 52.6             | 718 518            |
|    | Vγ1-8                   | Jγ1.1/2.1  | 3 100               | 112 863            | Vγ8  | JγP1  | 15.7             |                    |
| 37 | Vγ1-8                   | Jγ1.1/2.1  | 6 500 <sup>£</sup>  | 32 070             | Vγ3  | JγP1  | 60.3             | 53 216             |
|    | Vγ1-8                   | Jγ1.3/2.3  | 12 000 <sup>£</sup> | 19 351             | Vγ3  | Jγ1/2 | 36.4             |                    |
| 38 | Vγ1-8                   | Jγ1.3/2.3  | 8 000               | 17 268             | Vγ4  | Jγ1/2 | 30.4             | 56 774             |
| 39 | Vγ1-8                   | Jγ1.3/2.3  | 3 500 <sup>£</sup>  | 262 224            | Vγ4  | Jγ1/2 | 49.0             | 534 950            |
|    | Vγ9                     | Jγ1.3/2.3  | 10 500 <sup>£</sup> | 71 499             | Vγ9  | Jγ1/2 | 13.4             |                    |
| 40 | POLYCLONAL              |            |                     | 184¥               | Vγ2  | JγP1  | 0.5¥             | 35 229             |
| 41 | Vγ1-8                   | Jγ1.1/2.1  | 5 000 <sup>£</sup>  | 28 348             | Vγ3  | none  | 58.1             | 48 769             |
|    | Vγ9                     | Jγ1.1/2.1  | 11 300 <sup>£</sup> | 17 570             | Vγ9  | JγP1  | 36.0             |                    |
| 42 | POLYCLONAL              |            |                     | 300¥               | Vγ10 | JγP1  | 1.6¥             | 19 345             |
| 43 | Vγ9*                    | Jγ1.3/2.3* | 2 800               | 9 180 <sup>†</sup> | Vγ2  | none  | 3.8 <sup>†</sup> | 239 131            |
| 44 | POLYCLONAL              |            |                     | 2 127¥             | Vγ10 | JγP1  | 1.4¥             | 155 491            |
| 45 | Vγ11 <sup>‡</sup>       | NA         | 19 000              | 49 135             | Vγ11 | Jγ1/2 | 81.1             | 60 605             |
| 46 | Vγ1-8                   | Jγ1.1/2.1  | 20 400              | 23 533             | Vγ4  | JγP1  | 52.2             | 45 060             |
|    | Vγ1-8                   | Jγ1.1/2.1  | 20 400              | 18 972             | Vγ2  | JγP2  | 42.1             |                    |
| 47 | Vγ1-8                   | Jγ1.3/2.3  | 7 000               | 33 873             | Vγ3  | Jγ1/2 | 84.6             | 40 039             |
| 48 | Vγ1-8                   | Jγ1.3/2.3  | 2 700               | 50 803             | Vγ4  | Jγ1/2 | 70.8             | 71 800             |
| 49 | Vγ1-8*                  | Jγ1.3/2.3* | 4 300               | 188 <sup>†</sup>   | Vγ5  | Jγ1/2 | 11.6             | 1 620 <sup>†</sup> |
| 50 | Vγ1-8                   | Jγ1.3/2.3  | 33 000              | 20 952             | Vγ2  | Jγ1/2 | 83.2             | 25 185             |
| 51 | POLYCLONAL <sup>‡</sup> |            |                     | 26 047             | Vγ11 | JγP1  | 24.4             | 106 884            |
|    |                         |            |                     | 15 787             | Vγ11 | JγP1  | 14.8             |                    |

|    |       |            |                     |           |      |       |                  |           |
|----|-------|------------|---------------------|-----------|------|-------|------------------|-----------|
| 52 | Vγ1-8 | Jγ1.3/2.3  | 10 500              | 559 282   | Vγ4  | none  | 63.9             | 874 948   |
|    | Vγ1-8 | Jγ1.3/2.3  | 5 000               | 277 381   | Vγ5  | Jγ1/2 | 31.7             |           |
| 53 | Vγ1-8 | Jγ1.1/2.1  | 500 <sup>£</sup>    | 337 176   | Vγ2  | JγP1  | 56.9             | 592 517   |
|    | Vγ1-8 | Jγ1.3/2.3  | 2 900 <sup>£</sup>  | 230 765   | Vγ4  | Jγ1/2 | 39.0             |           |
| 54 | Vγ1-8 | Jγ1.3/2.3  | 7 100               | 19 706    | Vγ3  | Jγ1/2 | 25.7             | 76 701    |
| 55 | Vγ1-8 | Jγ1.3/2.3  | 6 700               | 52 795    | Vγ3  | Jγ1/2 | 70.0             | 75 456    |
|    | Vγ1-8 | Jγ1.3/2.3  | 5 600               | 19 831    | Vγ2  | Jγ1/2 | 26.3             |           |
| 56 | Vγ1-8 | Jγ1.3/2.3  | 10 500              | 120 249   | Vγ2  | Jγ1/2 | 53.0             | 227 044   |
|    | Vγ9   | Jγ1.3/2.3  | 10 500              | 47 124    | Vγ9  | Jγ1/2 | 20.8             |           |
|    | Vγ9   | Jγ1.3/2.3  | 4 100               | 25 222    | Vγ9  | Jγ1/2 | 11.1             |           |
|    | Vγ1-8 | Jγ1.3/2.3  | 600                 | 21 179    | Vγ3  | Jγ1/2 | 9.3 <sup>†</sup> |           |
| 57 | Vγ2*  | Jγ1.1/2.1* | 33 000              | 689 925   | Vγ2  | JγP2  | 56.9             | 1 212 505 |
|    | Vγ2*  | Jγ1.3/2.3* | 19 000              | 403 883   | Vγ2  | Jγ1/2 | 33.3             |           |
| 58 | Vγ8*  | Jγ1.1/2.1* | 33 000              | 599 995   | Vγ8  | JγP2  | 61.8             | 970 476   |
|    | Vγ8   | Jγ1.3/2.3  | 28 000              | 327 494   | Vγ8  | Jγ1/2 | 33.7             |           |
| 59 | Vγ8*  | Jγ1.3/2.3* | 3 400 <sup>£</sup>  | 575 351   | Vγ8  | Jγ1/2 | 62.1             | 926 969   |
|    | Vγ9*  | Jγ1.3/2.3* | 6 000 <sup>£</sup>  | 293 405   | Vγ9  | Jγ1/2 | 31.7             |           |
| 60 | Vγ5*  | Jγ1.3/2.3* | 9 000 <sup>£</sup>  | 21 565    | Vγ5  | Jγ1/2 | 61.2             | 35 231    |
|    | Vγ9*  | Jγ1.3/2.3* | 10 000 <sup>£</sup> | 12 287    | Vγ9  | Jγ1/2 | 34.9             |           |
| 61 | Vγ10* | Jγ1.3/2.3* | 7 000               | 453 471   | Vγ10 | Jγ1/2 | 49.1             | 924 069   |
|    | Vγ4*  | Jγ1.3/2.3* | 7 000               | 399 633   | Vγ4  | Jγ1/2 | 43.2             |           |
| 62 | Vγ4   | Jγ1.3/2.3  | 5 000               | 686 996   | Vγ4  | Jγ1/2 | 59.3             | 1 159 138 |
|    | Vγ2   | Jγ1.3/2.3  | 3 700               | 399 689   | Vγ2  | Jγ1/2 | 34.5             |           |
| 63 | Vγ4   | Jγ1.3/2.3  | 27 000              | 182 699   | Vγ4  | Jγ1/2 | 74.4             | 245 581   |
|    | Vγ5   | Jγ1.3/2.3  | 16 000              | 53 037    | Vγ5  | Jγ1/2 | 21.6             |           |
| 64 | Vγ4*  | Jγ1.3/2.3* | 13 300              | 3 155 792 | Vγ4  | Jγ1/2 | 51.0             | 6 184 779 |
|    | Vγ4   | Jγ1.3/2.3  | 8 700               | 2 845 490 | Vγ4  | Jγ1/2 | 46.0             |           |
| 65 | Vγ4   | Jγ1.3/2.3  | 33 000              | 50 434    | Vγ4  | Jγ1/2 | 50.5             | 99 944    |
|    | Vγ4   | Jγ1.3/2.3  | 30 000              | 45 557    | Vγ4  | Jγ1/2 | 45.6             |           |

|    |                |                     |         |         |               |                |      |         |
|----|----------------|---------------------|---------|---------|---------------|----------------|------|---------|
| 66 | V $\gamma$ 2   | J $\gamma$ 1.1/2.1  | 33 000  | 39 315  | V $\gamma$ 2  | J $\gamma$ P2  | 56.5 | 69 590  |
|    | V $\gamma$ 4   | J $\gamma$ 1.3/2.3  | 4 500   | 26 880  | V $\gamma$ 4  | J $\gamma$ 1/2 | 38.6 |         |
| 67 | V $\gamma$ 9*  | J $\gamma$ 1.1/2.1* | 3 200   | 1 010†  | V $\gamma$ 2  | J $\gamma$ 1/2 | 3.0† | 33 527  |
| 68 | POLYCLONAL     |                     |         | 386¥    | V $\gamma$ 10 | J $\gamma$ P1  | 0.9¥ | 42945   |
| 69 | V $\gamma$ 1-8 | J $\gamma$ 1.3/2.3  | 3 500   | 148 375 | V $\gamma$ 3  | J $\gamma$ 1/2 | 43.5 | 341 468 |
|    | V $\gamma$ 1-8 | J $\gamma$ 1.3/2.3  | 3 500   | 144 780 | V $\gamma$ 3  | J $\gamma$ 1/2 | 42.4 |         |
| 70 | V $\gamma$ 10  | J $\gamma$ 1.3/2.3  | 5 000   | 197 588 | V $\gamma$ 10 | J $\gamma$ 1/2 | 51.2 | 385 827 |
|    | V $\gamma$ 1-8 | J $\gamma$ 1.3/2.3  | 4 800   | 167 771 | V $\gamma$ 4  | J $\gamma$ 1/2 | 43.5 |         |
| 71 | V $\gamma$ 1-8 | J $\gamma$ 1.3/2.3  | 9 300   | 26 231  | V $\gamma$ 2  | J $\gamma$ 1/2 | 49.9 | 52 606  |
|    | V $\gamma$ 1-8 | J $\gamma$ 1.3/2.3  | 9 300   | 24 780  | V $\gamma$ 2  | J $\gamma$ 1/2 | 47.1 |         |
| 72 | POLYCLONAL     |                     |         | 704¥    | V $\gamma$ 2  | J $\gamma$ 1/2 | 1.4¥ | 49 809  |
| 73 | V $\gamma$ 10  | J $\gamma$ 1.3/2.3  | 6 300   | 33 154  | V $\gamma$ 10 | J $\gamma$ 1/2 | 52.9 | 62 688  |
| 74 | V $\gamma$ 1-8 | J $\gamma$ 1.1/2.1  | 20 300£ | 363 418 | V $\gamma$ 8  | J $\gamma$ P1  | 75.2 | 483 387 |
|    | V $\gamma$ 9   | J $\gamma$ 1.3/2.3  | 24 600£ | 99 114  | V $\gamma$ 9  | J $\gamma$ 1/2 | 20.5 |         |
| 75 | V $\gamma$ 9   | J $\gamma$ 1.3/2.3  | 13 500  | 179 078 | V $\gamma$ 9  | J $\gamma$ 1/2 | 41.4 | 432 308 |
|    | V $\gamma$ 9   | J $\gamma$ 1.3/2.3  | 11 000  | 140 589 | V $\gamma$ 9  | J $\gamma$ 1/2 | 32.5 |         |
| 76 | V $\gamma$ 1-8 | J $\gamma$ 1.1/2.1  | 1 800£  | 320 709 | V $\gamma$ 4  | J $\gamma$ P1  | 70.9 | 452 639 |
|    | V $\gamma$ 1-8 | J $\gamma$ 1.3/2.3  | 15 500£ | 116 733 | V $\gamma$ 2  | J $\gamma$ 1/2 | 25.8 |         |
| 77 | V $\gamma$ 1-8 | J $\gamma$ 1.3/2.3  | 10 000  | 216 917 | V $\gamma$ 4  | J $\gamma$ 1/2 | 53.3 | 406 732 |
|    | V $\gamma$ 1-8 | J $\gamma$ 1.3/2.3  | 6 300   | 144 117 | V $\gamma$ 3  | J $\gamma$ 1/2 | 35.4 |         |
| 78 | V $\gamma$ 1-8 | J $\gamma$ 1.3/2.3  | 7 000   | 20 755  | V $\gamma$ 8  | J $\gamma$ 1/2 | 51.2 | 40 506  |
|    | V $\gamma$ 1-8 | J $\gamma$ 1.3/2.3  | 6 000   | 18 657  | V $\gamma$ 5  | J $\gamma$ 1/2 | 46.1 |         |

\*Genes verified with Sanger Sequencing. The other genes were verified with GeneScan only, hence the NA in the J-gene column.

NA Not available

†Interpretation criteria not fulfilled, and/or the peak observed with GeneScan is very small or has a high background.

‡ The rearrangement(s) found with LymphoTrack were confirmed with qPCR and/or IVS TCRG 2.0 primer mix for PCR GeneScan.

¥Interpretation criteria not fulfilled due to polyclonal pattern.

£The RFU value of the peak in GeneScan does not correlate to the amplification frequency %Total reads in LymphoTrack.



**Supplementary Table S4.** Samples sequenced with LymphoTrack® Dx TRB Assay Panel - MiSeq®. The rearrangements, for each sample, are listed in falling order based on sequence frequency (%Total reads) from LymphoTrack.

| TCRβ                             |                                            |        |                     |                              |        |        |                  |             |
|----------------------------------|--------------------------------------------|--------|---------------------|------------------------------|--------|--------|------------------|-------------|
| Rearrangement<br>GeneScan/Sanger |                                            |        |                     | Rearrangement<br>LymphoTrack |        |        |                  |             |
| ID                               | V-gene/<br>D-gene                          | J-gene | RFU 1:0             | Merge<br>count               | V-gene | J.gene | % total<br>reads | Total count |
| 57                               | Vβ5*                                       | Jβ1.1* | 1 000 <sup>£</sup>  | 593 417                      | Vβ5-1  | Jβ1-1  | 66.7             | 890 300     |
|                                  | Dβ1*                                       | Jβ1.4* | 8 800 <sup>£</sup>  | 158 941                      | Dβ1    | Jβ1-4  | 17.9             |             |
| 58                               | VB6-6*                                     | JB1.1* | 8 700               | 597 583                      | Vβ6-6  | none   | 47.5             | 1 258 658   |
|                                  | Vβ                                         | JB1    | 4 500               | 320 188                      | Vβ6-6  | none   | 25.4             |             |
|                                  | VB6-2 or<br>VB6-3*                         | JB2.5* | 1 700               | 151 377                      | Vβ6-3‡ | Jβ2-5  | 12.0             |             |
| 59                               | Dβ1*                                       | Jβ1.6* | 33 000              | 945 638                      | Dβ1    | Jβ1-6  | 60.2             | 1 572 017   |
|                                  | Vβ7-2*                                     | Jβ2.7* | 1 300               | 342 467                      | Vβ7-2  | Jβ2-7  | 21.8             |             |
| 60                               | Dβ2*                                       | Jβ2.1* | 15 000              | 36 669                       | Dβ2    | Jβ2-1  | 42.3             | 86 637      |
|                                  | Dβ1*                                       | Jβ1.6* | 11 000              | 23 601                       | Dβ1    | Jβ1-6  | 27.2             |             |
|                                  | Dβ1                                        | Jβ1    | 7 000               | 18 961                       | Dβ1    | Jβ1-5  | 21.9             |             |
| 61                               | Dβ1*                                       | Jβ2.7* | 3 300 <sup>£</sup>  | 634 894                      | Dβ1    | none   | 57.2             | 1 110 782   |
|                                  | Vβ20*                                      | Jβ2.1* | 11 800 <sup>£</sup> | 258 566                      | Vβ20-1 | Jβ2-1  | 23.3             |             |
|                                  | Vβ                                         | Jβ1    | 3 000 <sup>£</sup>  |                              |        | ND     |                  |             |
| 62                               | Vβ20-1*                                    | Jβ2.1* | 4 600               | 413 915                      | Vβ20-1 | Jβ2-1  | 59.4             | 696 246     |
| 63                               | Vβ                                         | Jβ1    | 16 000 <sup>£</sup> | 94 903                       | Vβ14   | Jβ1-1  | 67.6             | 140 362     |
|                                  | Vβ10-1*                                    | Jβ1-4* | 2 500 <sup>£</sup>  | 21 410                       | Vβ10-1 | Jβ1-4  | 15.3             |             |
|                                  | Dβ2*                                       | Jβ2.1* | 21 500 <sup>£</sup> | 18 043                       | Dβ2    | Jβ2-1  | 12.9             |             |
| 64                               | Vβ5-1*                                     | Jβ1.5* | 28 000              | 52 977                       | Vβ5-1  | Jβ1-5  | 52.0             | 101 798     |
|                                  | Dβ1*                                       | Jβ1.5* | 18 000              | 41 155                       | Dβ1    | Jβ1-5  | 40.4             |             |
| 65                               | Data NA for TRB due to lack of DNA sample. |        |                     |                              |        |        |                  |             |
| 66                               | Vβ12-5                                     | Jβ2.1  | 24 600              | 60 300                       | Vβ12-5 | Jβ2-1  | 51.0             | 118 307     |
|                                  | Dβ1*                                       | Jβ1.4* | 5 300               | 35 065                       | Dβ1    | Jβ1-4  | 29.6             |             |
| 67                               | POLYCLONAL                                 |        |                     | 282¥                         | Vβ11-2 | Jβ.3   | 2.4¥             | 11 611      |
| 68                               | POLYCLONAL                                 |        |                     | 2 445¥                       | Dβ1    | Jβ1.1  | 3.6¥             | 68 141      |

|    |            |        |                     |         |        |       |      |         |
|----|------------|--------|---------------------|---------|--------|-------|------|---------|
| 69 | Vβ9        | Jβ1.5  | 30 700 <sup>£</sup> | 174 866 | Vβ9    | Jβ1-5 | 39.8 | 439 808 |
|    | Dβ1*       | Jβ2.1* | 32 700 <sup>£</sup> | 135 827 | Dβ1    | Jβ2-1 | 30.9 |         |
| 70 | Dβ         | Jβ1    | 7 300 <sup>£</sup>  | 545 781 | Dβ1    | Jβ1-4 | 68.8 | 793 276 |
|    | Vβ         | Jβ2    | 8 400 <sup>£</sup>  | 74 730  | Vβ7-7  | Jβ2-1 | 9.4† |         |
| 71 | Dβ2        | Jβ2    | 33 000              | 75 230  | Dβ2    | Jβ2-3 | 54.2 | 138 756 |
|    | Vβ         | Jβ2    | 33 000              | 50 861  | Vβ27   | Jβ2-2 | 36.7 |         |
| 72 | POLYCLONAL |        |                     | 53¥     | Vβ18   | Jβ1-2 | 0.8¥ | 6 989   |
| 73 | Dβ2        | Jβ2    | 4 000               | 17 387  | Dβ2    | Jβ2-1 | 9.2† | 189 830 |
| 74 | Dβ1        | Jβ1    | 27 000              | 44 023  | Dβ1    | Jβ1-1 | 86.6 | 50 828  |
| 75 | Dβ1        | Jβ1    | 11 200              | 404 646 | Dβ1    | Jβ1-3 | 59.8 | 677 050 |
| 76 | Vβ         | Jβ1    | 29 300              | 441 918 | Vβ10-1 | Jβ1-4 | 63.5 | 695 786 |
|    | Dβ1        | Jβ2    | 8 300               | 188 802 | Dβ1    | Jβ2-1 | 27.1 |         |
| 77 | Vβ         | Jβ2    | 10 900              | 568 757 | Vβ12-4 | Jβ2-5 | 81.5 | 597 922 |
| 78 | Dβ1        | Jβ1    | 5 000 <sup>£</sup>  | 37 303  | Dβ1    | Jβ1-1 | 33.4 | 111 579 |
|    |            | ND     |                     | 35 905  | Dβ1    | Jβ1-2 | 32.2 |         |
|    | Dβ2        | Jβ2    | 22 000 <sup>£</sup> | 18 891  | Dβ2    | Jβ2-3 | 16.9 |         |

\*Genes verified with Sanger Sequencing. The other genes were verified with GeneScan only.

**ND** Not Detected

**NA** Not Available

†Interpretation criteria not fulfilled, and/or the peak observed with GeneScan is very small or has a high background.

‡The LymphoTrack Software states another gene family number than the IMGT database.

¥Interpretation criteria not fulfilled due to polyclonal pattern.

£The RFU value of the peak in GeneScan does not correlate to the amplification frequency %Total reads in LymphoTrack.
